# Supplementary material for: Analysis of Immunization, Adverse Events, and Efficacy of a Fourth Dose of BNT162b2 Vaccine in Health Workers in Mexico, a Pilot Study
Source: MDPI journal article supplement (doi:10.3390/vaccines10071139), 2022-07-17
Supplement: s1 [file s1]

# Supplementary Material

**Table S1.** Medical History.

| Medical history (n = 112)         | Frequency (%) |
|-----------------------------------|---------------|
| Obesity                           | 32 (28.6)     |
| Hypertension                      | 12 (10.7)     |
| Dyslipidemia                      | 9 (8.0)       |
| Prediabetes                       | 8 (7.1)       |
| Hypothyroidism                    | 7 (6.3)       |
| Smoking                           | 7 (6.3)       |
| Type 2 Diabetes Mellitus          | 6 (5.4)       |
| Non-alcoholic fatty liver disease | 4 (3.6)       |
| Asthma                            | 3 (2.7)       |
| Rheumatoid arthritis              | 2 (1.8)       |
| Use of immunosuppressive therapy  | 2 (1.8)       |
| Atrial fibrillation               | 1 (0.9)       |
| Heart failure                     | 1 (0.9)       |
| Coronary heart disease            | 1 (0.9)       |
| Stroke                            | 1 (0.9)       |
| Gout                              | 1 (0.9)       |
| Pregnancy                         | 1 (0.9)       |

Data are presented in frequencies and percentages.
